# Supplementary material
Source: PubMed Central journal article supplement (PMC7213481)

**Supplemental Material S2.** Individual performance on treatment and control words across all baseline and treatment sessions. Participants in higher dose number condition (3 words, 90 doses per word):

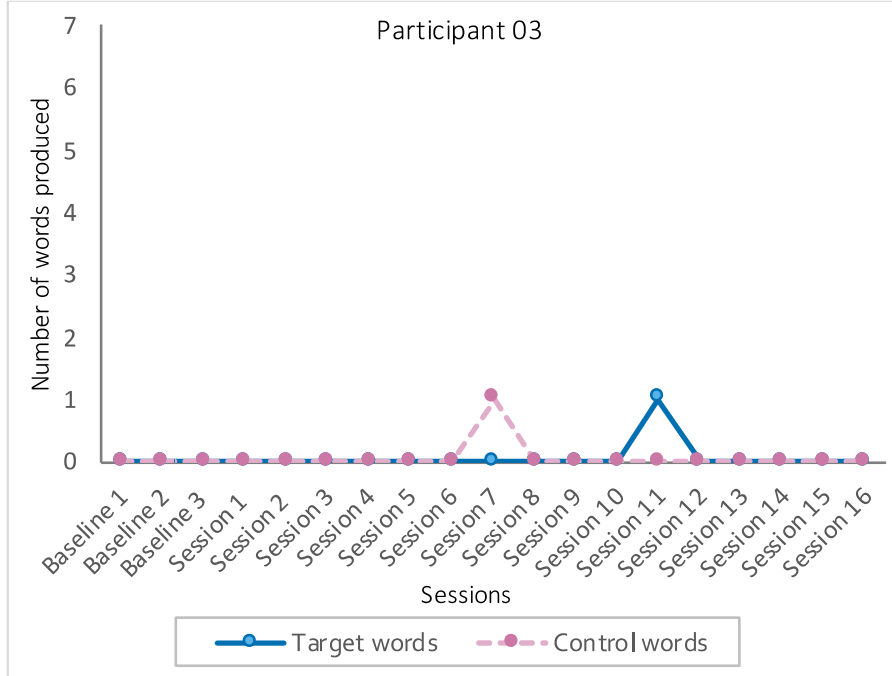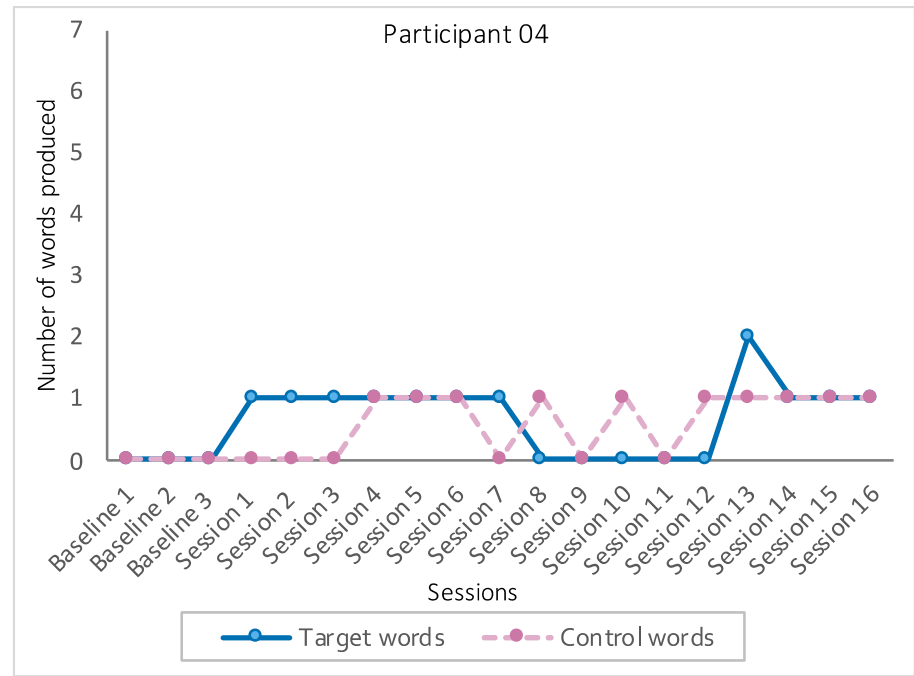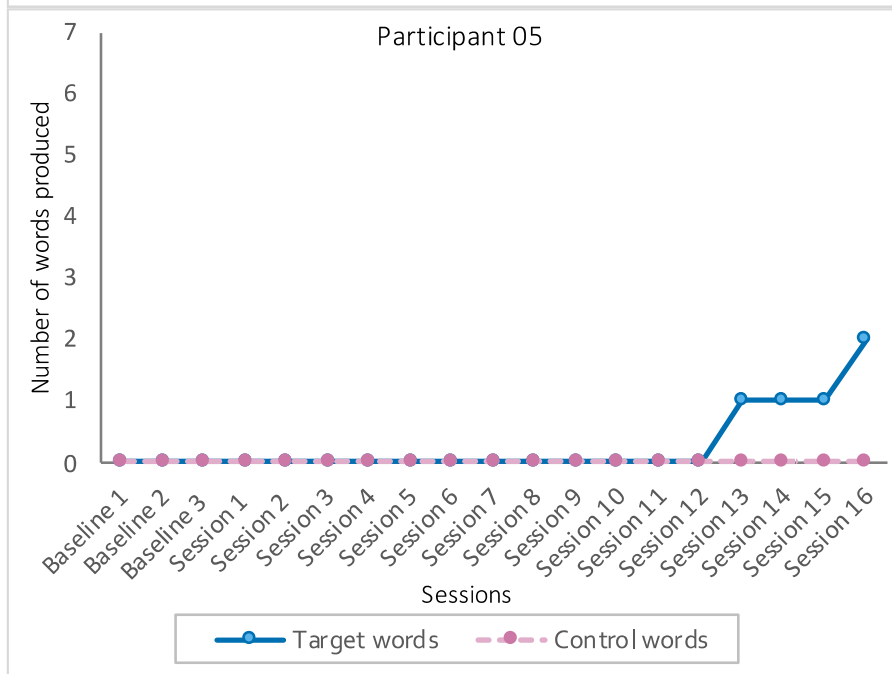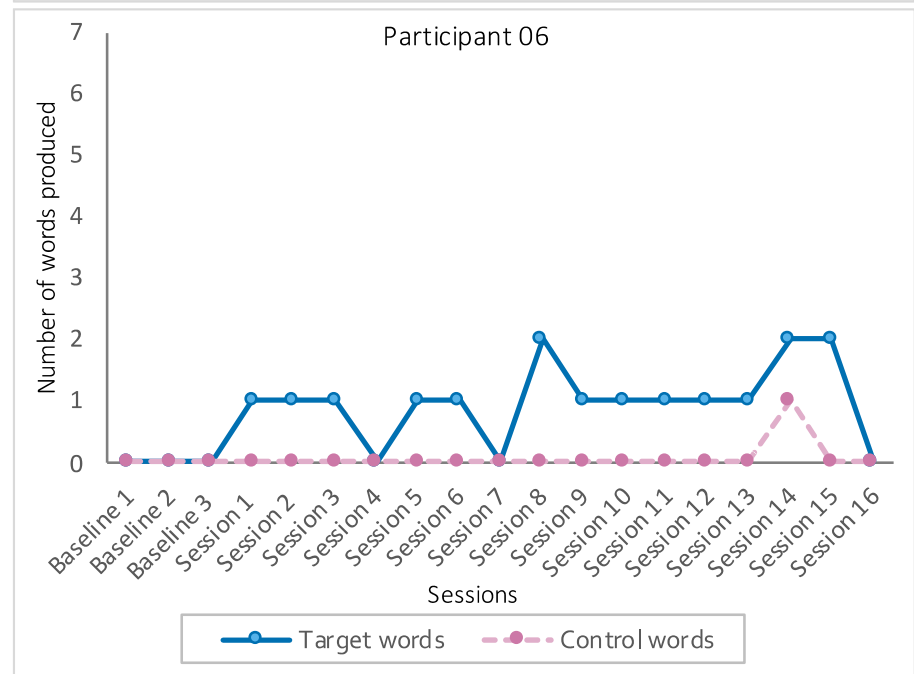

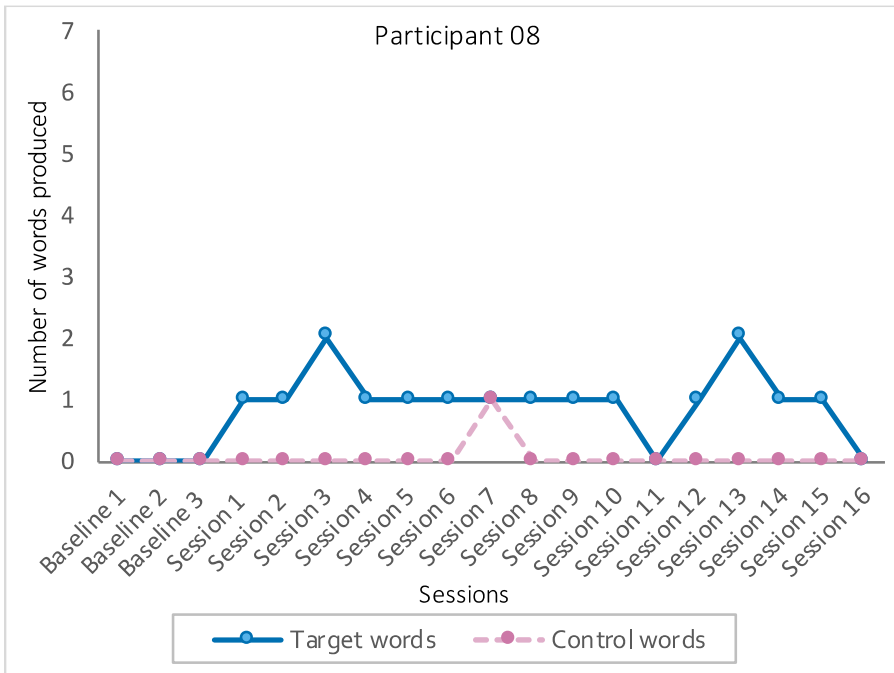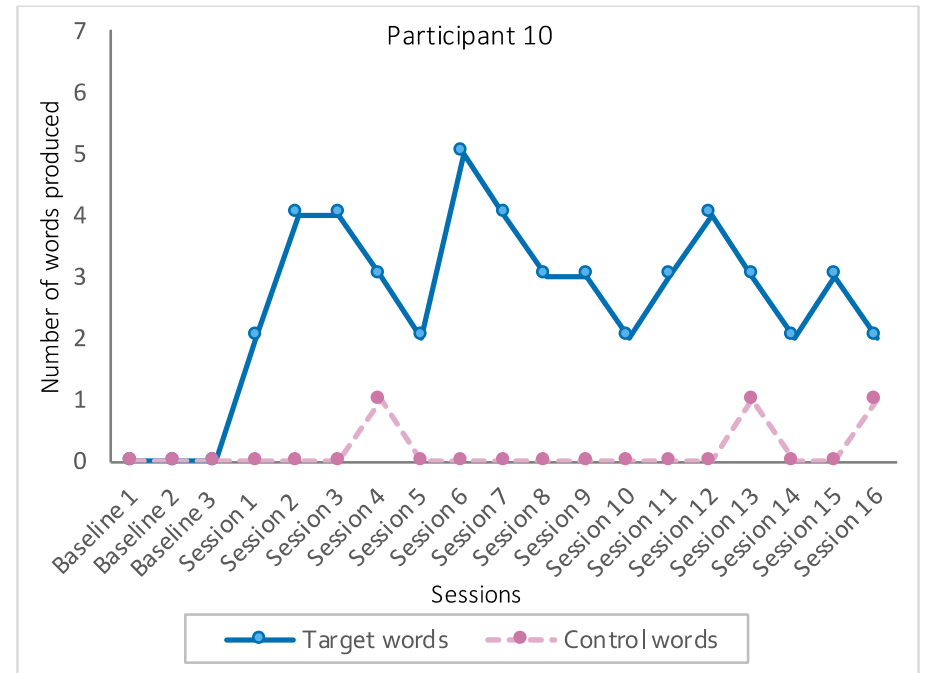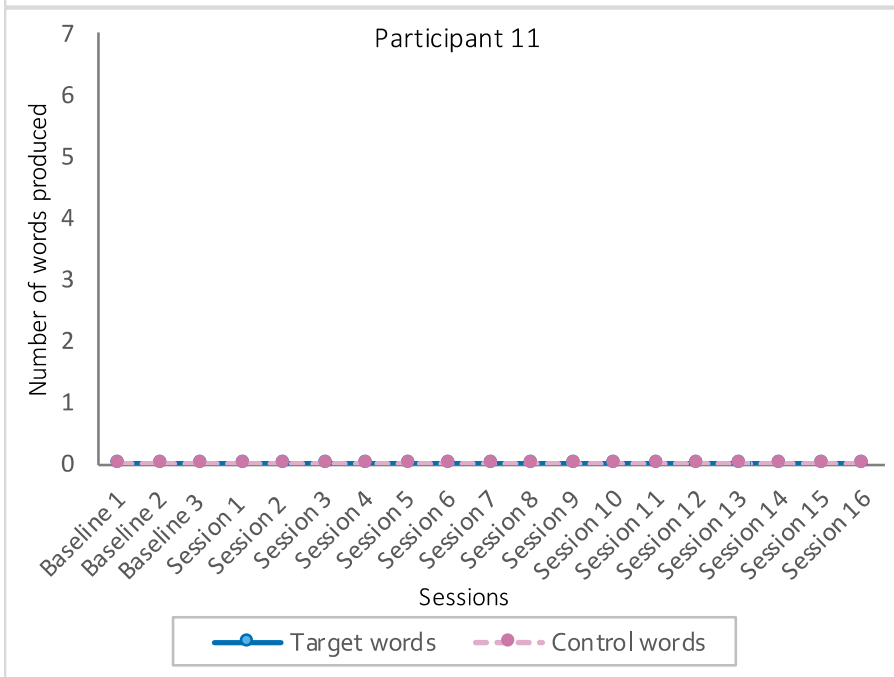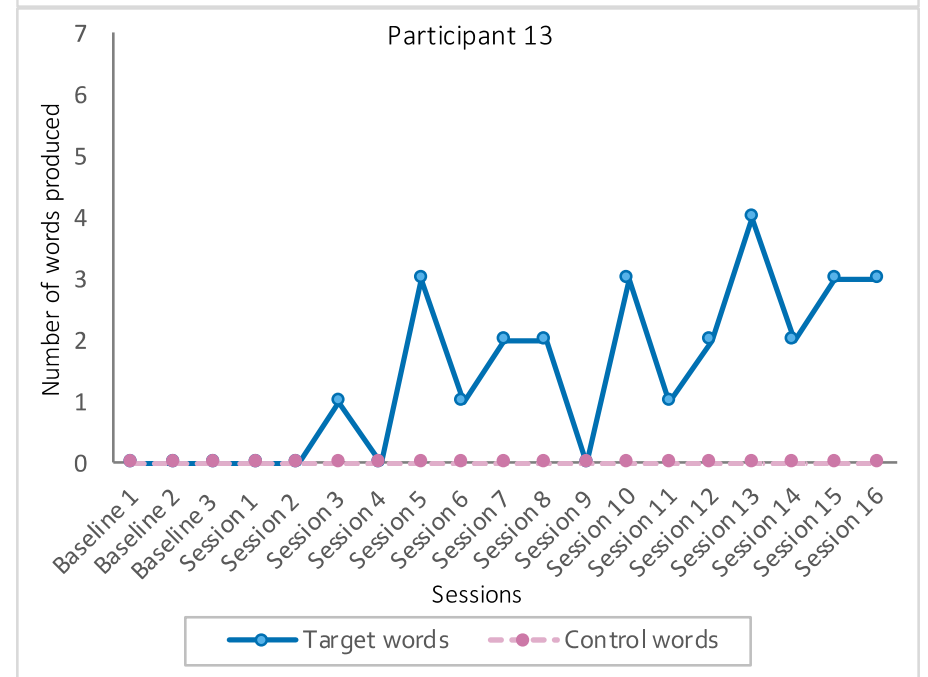

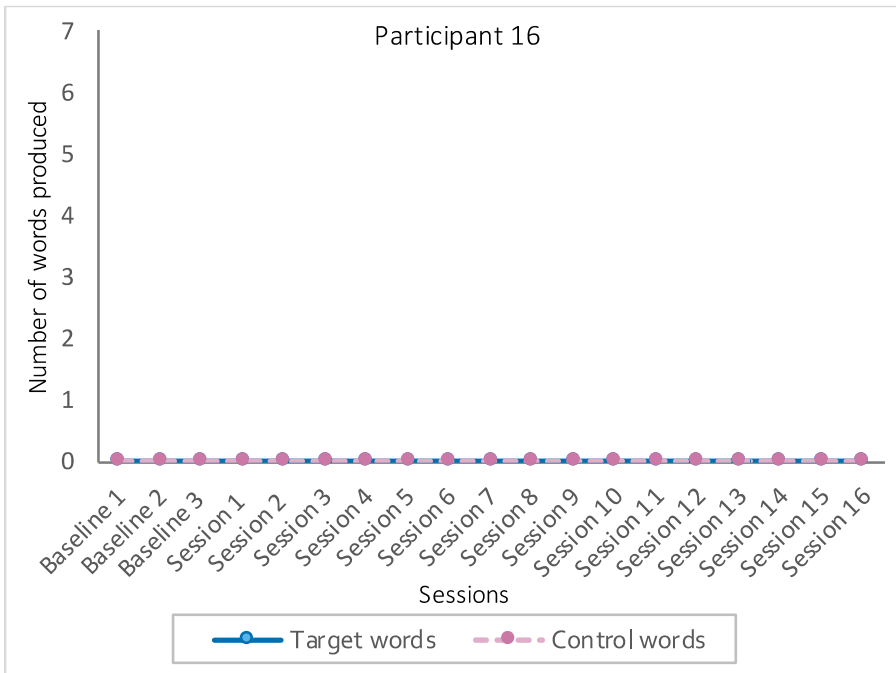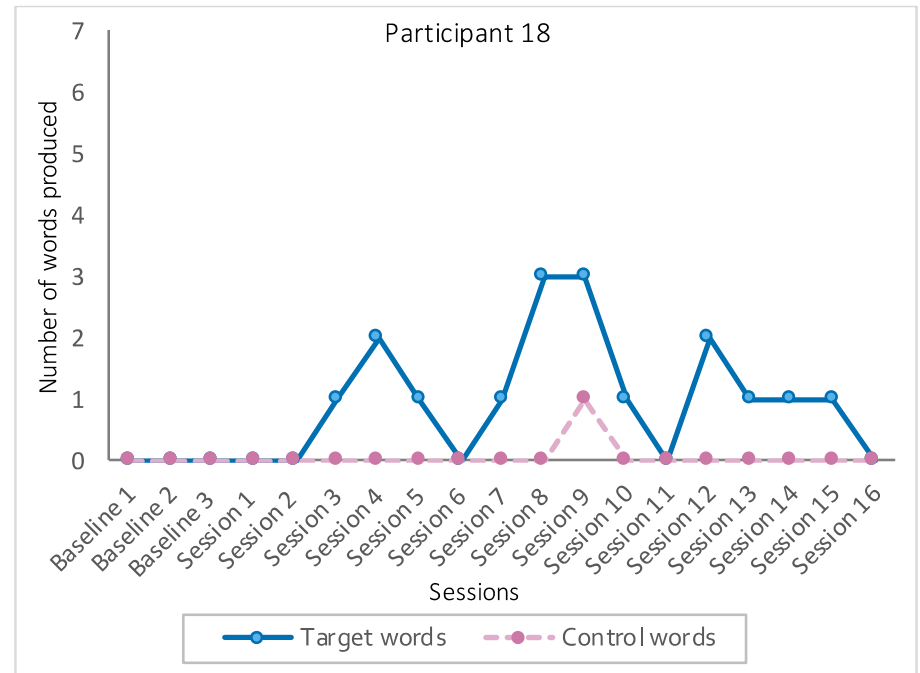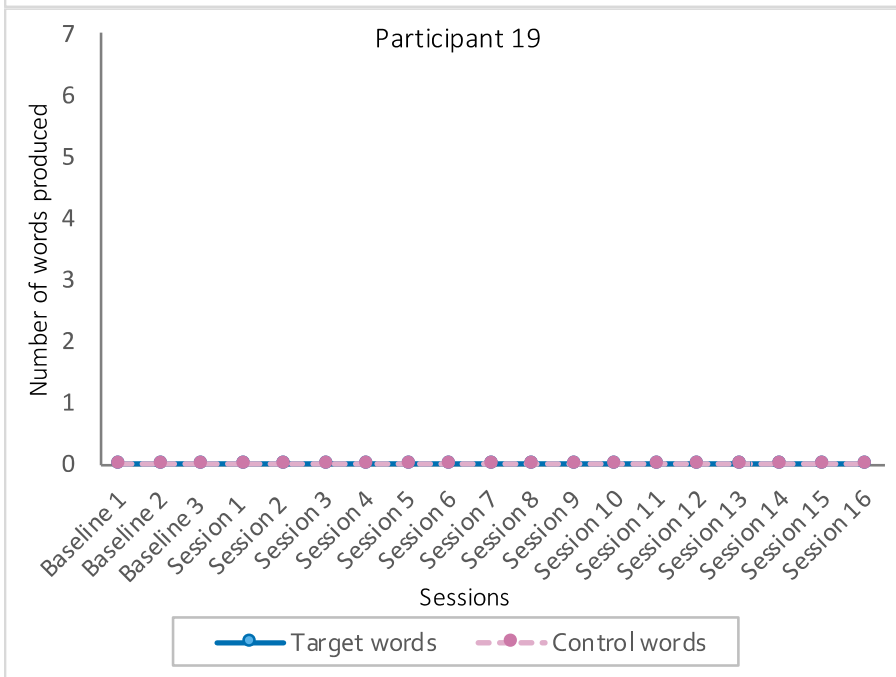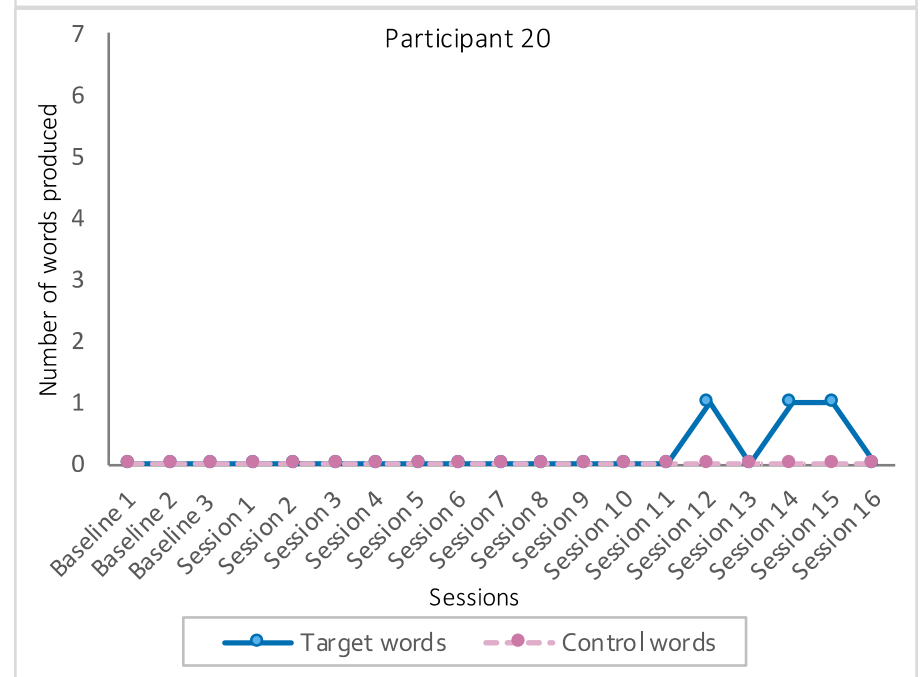

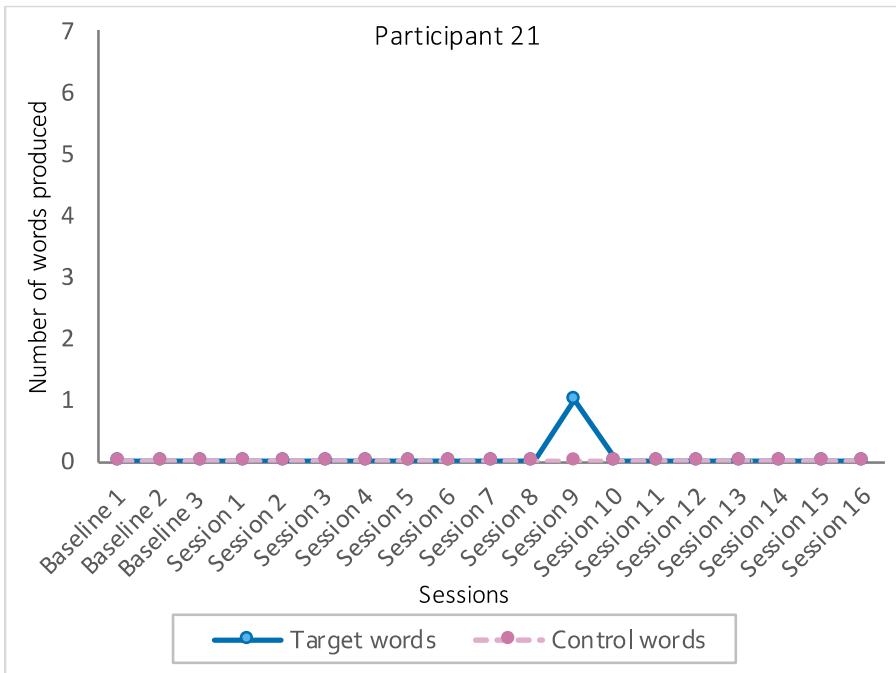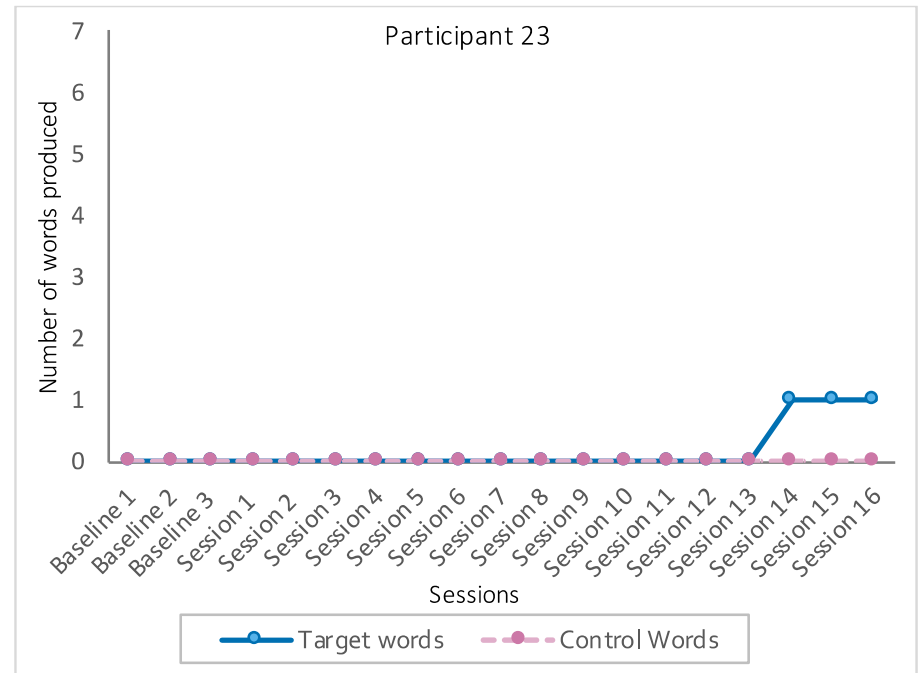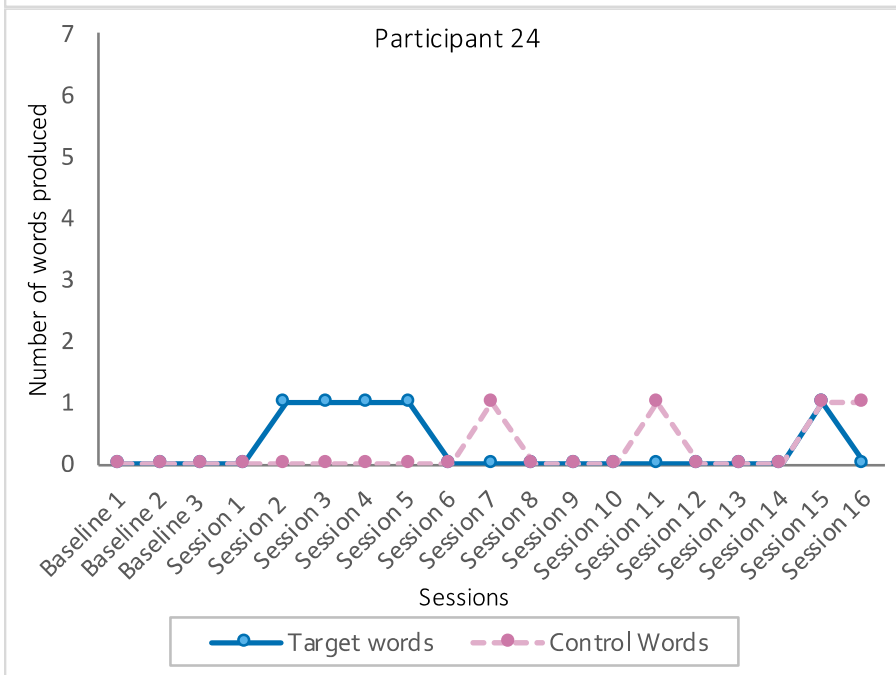

Participants in lower dose number condition (6 words, 45 doses per word):

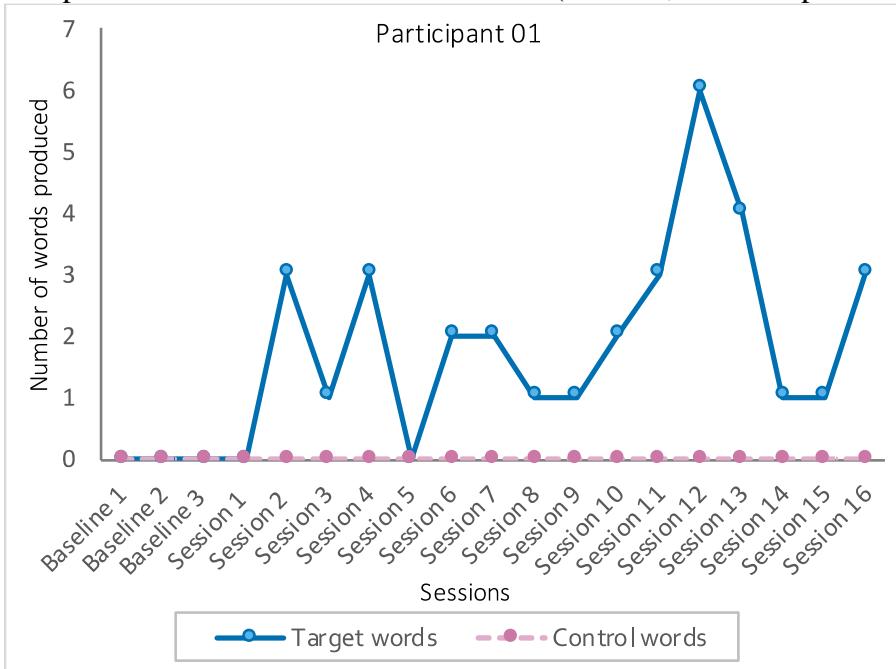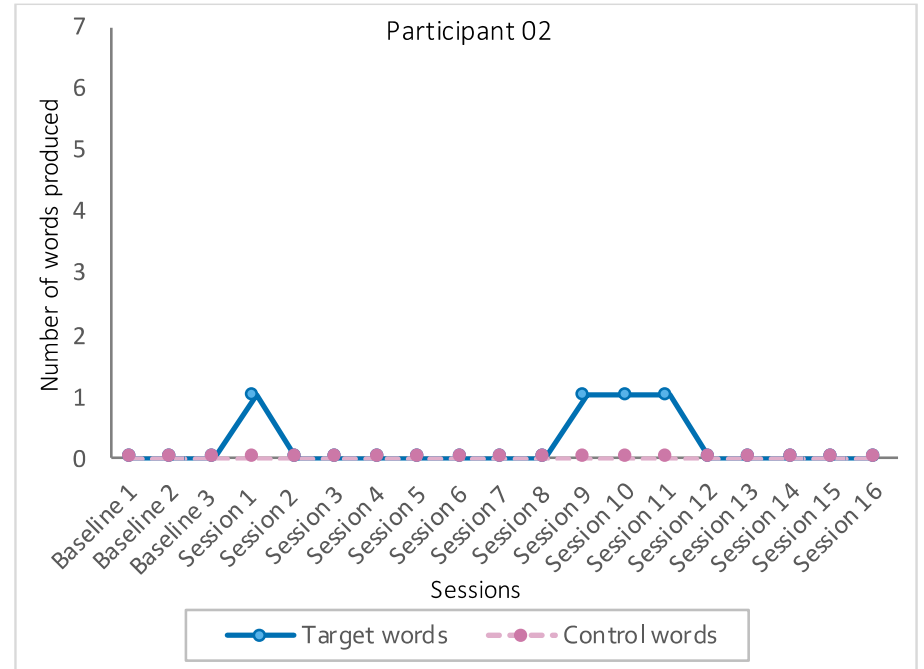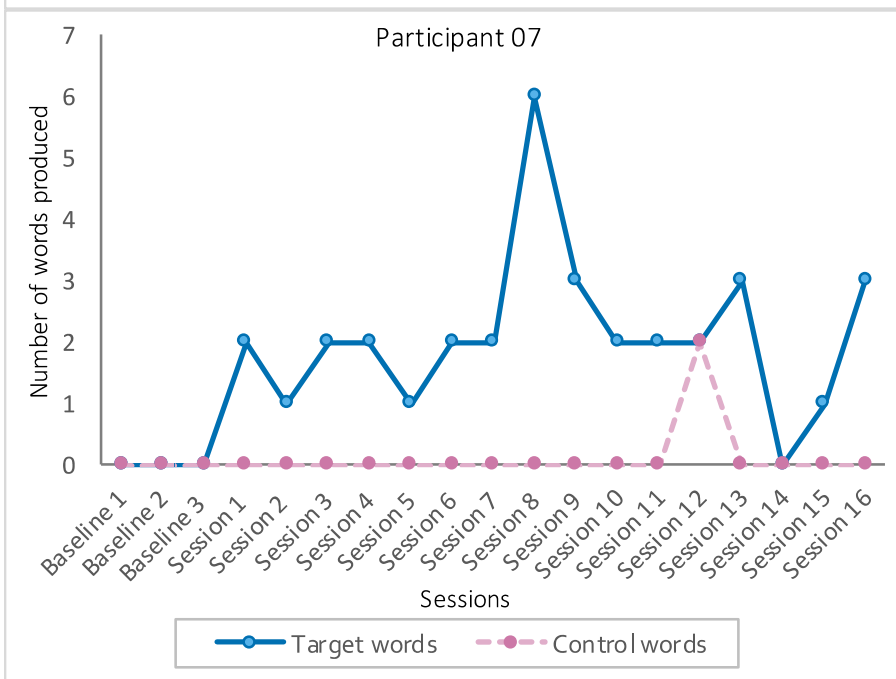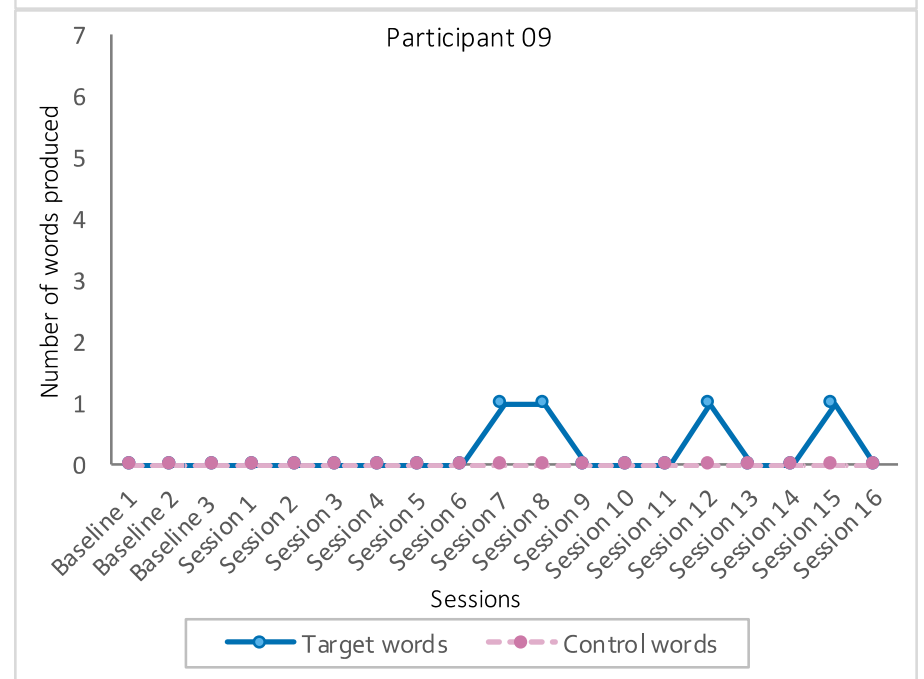

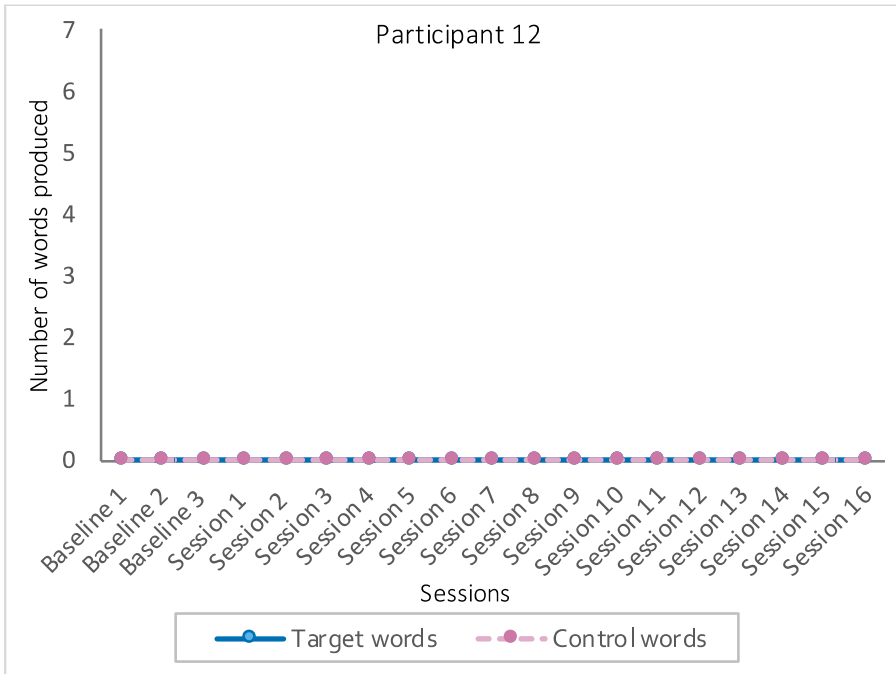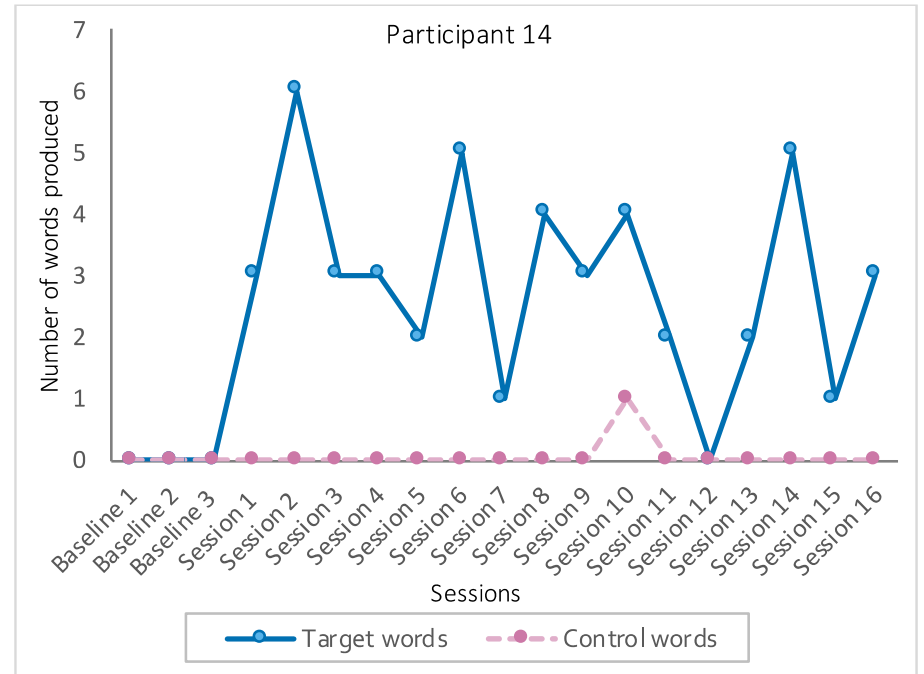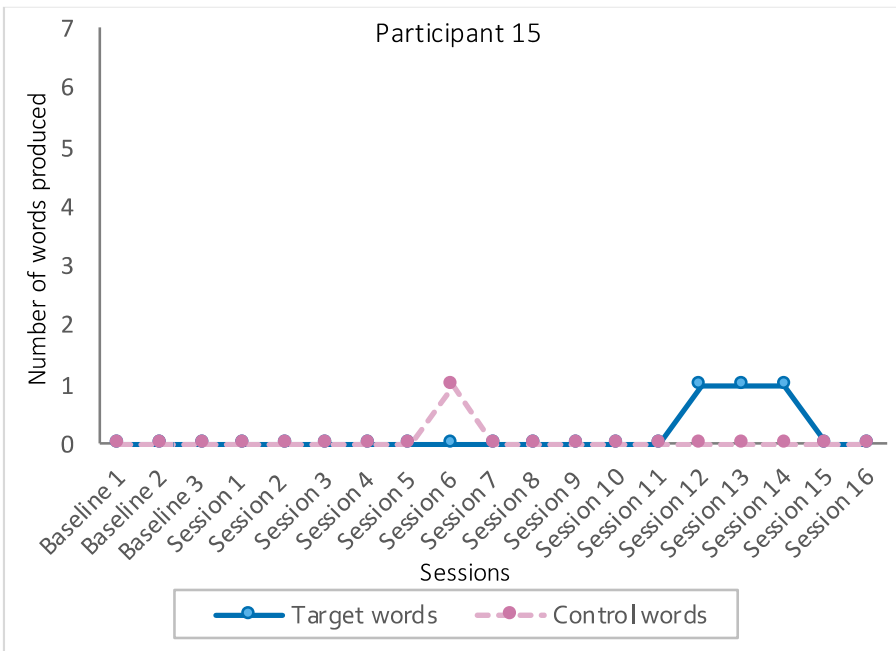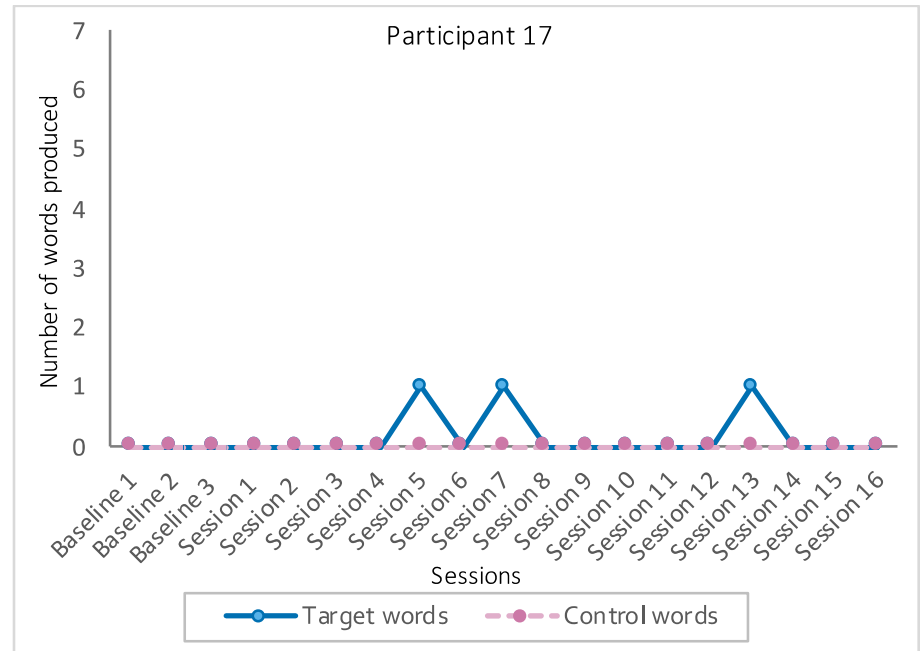

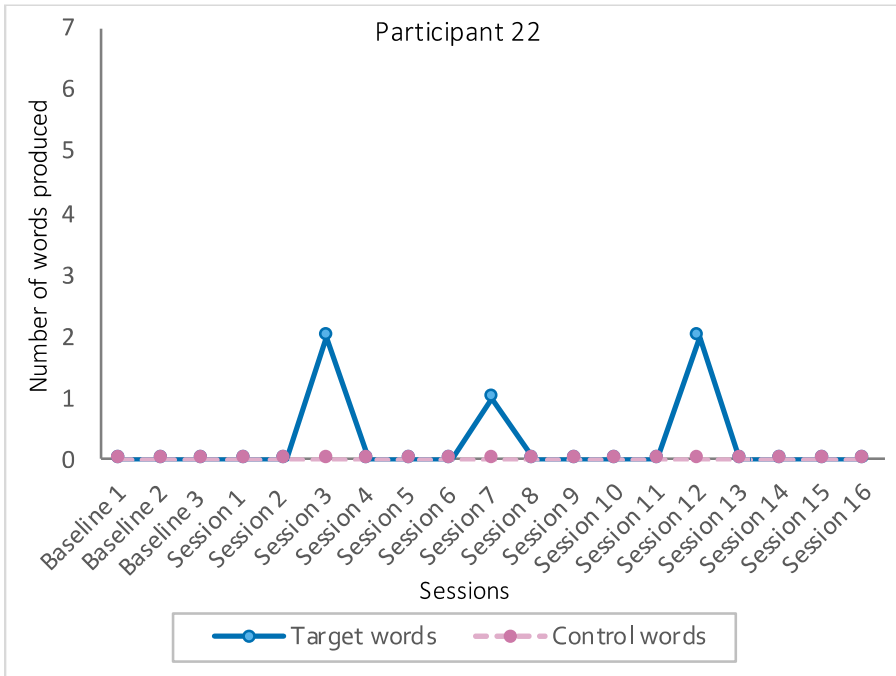

Supplement: JSLHR-63-216-s002.pdf [file JSLHR-63-216-s002.pdf]
